# Supplementary material for: Molecular Epidemiologic and Geo-Spatial Characterization of Staphylococcus aureus Cultured from Skin and Soft Tissue Infections from United States-Born and Immigrant Patients Living in New York City
Source: MDPI journal article supplement (doi:10.3390/antibiotics12101541), 2023-10-14
Supplement: s1 [file s1]

**Table S1.** Population Characteristics Variable Descriptions

|                                  |                                                                                                                                                                                                                                      |
|----------------------------------|--------------------------------------------------------------------------------------------------------------------------------------------------------------------------------------------------------------------------------------|
| <b>Gender</b>                    | Female, male                                                                                                                                                                                                                         |
| <b>Race</b>                      | Black, white, other ()                                                                                                                                                                                                               |
| <b>Ethnicity</b>                 | Hispanic, Non-Hispanic                                                                                                                                                                                                               |
| <b>Age</b>                       | < 19, 19-45, 45-65, and > 65 years old                                                                                                                                                                                               |
| <b>Marital Status</b>            | Married, single                                                                                                                                                                                                                      |
| <b>Education</b>                 | Highest degree obtained<br>High school diploma or below, some college, Bachelor's or above                                                                                                                                           |
| <b>Healthcare Insurance</b>      | Public, private, none, other ()                                                                                                                                                                                                      |
| <b>Self-Rated Health</b>         | Self-reported overall health<br>Poor, fair, good (includes very good and excellent)                                                                                                                                                  |
| <b>Income</b>                    | Total combined family income for the past 12 months<br>≥ \$40,000, < \$40,000                                                                                                                                                        |
| <b>First Time Infection</b>      | Is this a first-time infection?<br>Yes, No                                                                                                                                                                                           |
| <b>Crowding Life Environment</b> | Do they live, work, or spend time in a crowded environment, such as a bedroom with at least one other person, dormitory, prison, daycare center, nursing home, contact sports, or international travel in the past month?<br>Yes, No |
| <b>Healthcare Exposure</b>       | Have they worked or spent time in a healthcare facility or correctional facility in the past month?<br>Yes, No                                                                                                                       |
| <b>Contact Animal</b>            | Have they worked or spent time with animals (including pets) in the past month?<br>Yes, No                                                                                                                                           |
| <b>Had Wounds</b>                | Have they had surgery or a wound in the past month?<br>Yes, No                                                                                                                                                                       |
| <b>Social Network</b>            | Does anyone in their household have a risk factor for <i>S. aureus</i> infection, such as recent surgery, work in the healthcare field, or recent SSTI in the past month?<br>Yes, No                                                 |
| <b>Household Crowding</b>        | Number of people (excluding newborns) that live in a household<br><2 people, ≥2 People                                                                                                                                               |
| <b>Personal Hygiene</b>          | Do they share personal hygiene products (towels, unwashed clothes, razors) with another person or re-wear clothing?<br>Yes, No                                                                                                       |
| <b>Washing Hands</b>             | How many times a day do they wash their hands?<br>< 10 times/day, > 10 times/day                                                                                                                                                     |

**Table S2.** MRSA v MSSA in all study population.

|                                | <b>MRSA<br/>(N=67)</b> | <b>MSSA<br/>(N=60)</b> | <b>Total<br/>(N=127)</b> | <b>P-value</b>    |
|--------------------------------|------------------------|------------------------|--------------------------|-------------------|
| <b>Gender, n (%)</b>           |                        |                        |                          | 0.10 <sup>1</sup> |
| Female                         | 32 (47.8%)             | 20 (33.3%)             | 52 (40.9%)               |                   |
| Male                           | 35 (52.2%)             | 40 (66.7%)             | 75 (59.1%)               |                   |
| <b>Race, n (%)</b>             |                        |                        |                          | 0.98 <sup>1</sup> |
| Black                          | 15 (36.6%)             | 15 (37.5%)             | 30 (37.0%)               |                   |
| White                          | 12 (29.3%)             | 11 (27.5%)             | 23 (28.4%)               |                   |
| Other Race                     | 14 (34.1%)             | 14 (35.0%)             | 28 (34.6%)               |                   |
| Missing                        | 26                     | 20                     | 46                       |                   |
| <b>Ethnicity, n (%)</b>        |                        |                        |                          | 0.78 <sup>1</sup> |
| Hispanic                       | 43 (67.2%)             | 33 (64.7%)             | 76 (66.1%)               |                   |
| Non-Hispanic                   | 21 (32.8%)             | 18 (35.3%)             | 39 (33.9%)               |                   |
| Missing                        | 3                      | 9                      | 12                       |                   |
| <b>Age (Years), n (%)</b>      |                        |                        |                          | 0.37 <sup>1</sup> |
| < 19                           | 6 (9.0%)               | 4 (6.7%)               | 10 (7.9%)                |                   |
| 19-45                          | 43 (64.2%)             | 31 (51.7%)             | 74 (58.3%)               |                   |
| 45-65                          | 16 (23.9%)             | 22 (36.7%)             | 38 (29.9%)               |                   |
| > 65                           | 2 (3.0%)               | 3 (5.0%)               | 5 (3.9%)                 |                   |
| <b>Birthplace, n (%)</b>       |                        |                        |                          | 0.11 <sup>1</sup> |
| US Born                        | 47 (70.1%)             | 34 (56.7%)             | 81 (63.8%)               |                   |
| Non-US Born                    | 20 (29.9%)             | 26 (43.3%)             | 46 (36.2%)               |                   |
| <b>Marital Status, n (%)</b>   |                        |                        |                          | 0.77 <sup>1</sup> |
| Couple                         | 24 (36.4%)             | 20 (33.9%)             | 44 (35.2%)               |                   |
| Single                         | 42 (63.6%)             | 39 (66.1%)             | 81 (64.8%)               |                   |
| Missing                        | 1                      | 1                      | 2                        |                   |
| <b>Education, n (%)</b>        |                        |                        |                          | 0.43 <sup>1</sup> |
| High School or lower           | 41 (62.1%)             | 43 (72.9%)             | 84 (67.2%)               |                   |
| College                        | 15 (22.7%)             | 9 (15.3%)              | 24 (19.2%)               |                   |
| Bachelor or higher             | 10 (15.2%)             | 7 (11.9%)              | 17 (13.6%)               |                   |
| Missing                        | 1                      | 1                      | 2                        |                   |
| <b>Health Insurance, n (%)</b> |                        |                        |                          | 0.68 <sup>1</sup> |
| Private or Other               | 14 (21.2%)             | 10 (16.9%)             | 24 (19.2%)               |                   |
| Public (Medicare or Medicaid)  | 39 (59.1%)             | 34 (57.6%)             | 73 (58.4%)               |                   |
| None                           | 13 (19.7%)             | 15 (25.4%)             | 28 (22.4%)               |                   |
| Missing                        | 1                      | 1                      | 2                        |                   |
| <b>Health Quality, n (%)</b>   |                        |                        |                          | 0.79 <sup>1</sup> |
| Good                           | 44 (69.8%)             | 38 (64.4%)             | 82 (67.2%)               |                   |
| Fair                           | 16 (25.4%)             | 17 (28.8%)             | 33 (27.0%)               |                   |
| Poor                           | 3 (4.8%)               | 4 (6.8%)               | 7 (5.7%)                 |                   |
| Missing                        | 4                      | 1                      | 5                        |                   |

|                                         |            |            |            |                     |
|-----------------------------------------|------------|------------|------------|---------------------|
| <b>Income, n (%)</b>                    |            |            |            | 0.58 <sup>1</sup>   |
| ≥\$40,000                               | 5 (10.0%)  | 6 (13.6%)  | 11 (11.7%) |                     |
| < \$40,000                              | 45 (90.0%) | 38 (86.4%) | 83 (88.3%) |                     |
| Missing                                 | 17         | 16         | 33         |                     |
| <b>First Time Infection, n (%)</b>      |            |            |            | 0.58 <sup>1</sup>   |
| No                                      | 18 (28.6%) | 14 (24.1%) | 32 (26.4%) |                     |
| Yes                                     | 45 (71.4%) | 44 (75.9%) | 89 (73.6%) |                     |
| Missing                                 | 4          | 2          | 6          |                     |
| <b>Crowding Life Environment, n (%)</b> |            |            |            | 0.03 <sup>1</sup>   |
| Yes                                     | 46 (76.7%) | 34 (57.6%) | 80 (67.2%) |                     |
| No                                      | 14 (23.3%) | 25 (42.4%) | 39 (32.8%) |                     |
| Missing                                 | 7          | 1          | 8          |                     |
| <b>Healthcare Exposure, n (%)</b>       |            |            |            | 0.80 <sup>1</sup>   |
| Yes                                     | 21 (34.4%) | 22 (36.7%) | 43 (35.5%) |                     |
| No                                      | 40 (65.6%) | 38 (63.3%) | 78 (64.5%) |                     |
| Missing                                 | 6          | 0          | 6          |                     |
| <b>Animal Contact, n (%)</b>            |            |            |            | 0.08 <sup>1</sup>   |
| Yes                                     | 26 (41.9%) | 44 (73.3%) | 80 (65.6%) |                     |
| No                                      | 36 (58.1%) | 16 (26.7%) | 42 (34.4%) |                     |
| Missing                                 | 5          | 0          | 5          |                     |
| <b>Had Wounds, n (%)</b>                |            |            |            | 0.08 <sup>1</sup>   |
| Yes                                     | 16 (25.4%) | 24 (40.0%) | 40 (32.5%) |                     |
| No                                      | 47 (74.6%) | 36 (60.0%) | 83 (67.5%) |                     |
| Missing                                 | 4          | 0          | 4          |                     |
| <b>Social Network, n (%)</b>            |            |            |            | 0.40 <sup>1</sup>   |
| Yes                                     | 15 (24.6%) | 11 (18.3%) | 26 (21.5%) |                     |
| No                                      | 46 (75.4%) | 49 (81.7%) | 95 (78.5%) |                     |
| Missing                                 | 6          | 0          | 6          |                     |
| <b>Household Crowding, n (%)</b>        |            |            |            | 0.94 <sup>1</sup>   |
| <2 People                               | 17 (30.9%) | 16 (30.2%) | 33 (30.6%) |                     |
| >2 People                               | 38 (69.1%) | 37 (69.8%) | 75 (69.4%) |                     |
| Missing                                 | 12         | 7          | 19         |                     |
| <b>Personal Hygiene, n (%)</b>          |            |            |            | 0.06 <sup>1</sup>   |
| Not Sharing                             | 29 (52.7%) | 18 (34.6%) | 47 (43.9%) |                     |
| Sharing                                 | 26 (47.3%) | 34 (65.4%) | 60 (56.1%) |                     |
| Missing                                 | 12         | 8          | 20         |                     |
| <b>Hand Washing, n (%)</b>              |            |            |            | 0.11 <sup>1</sup>   |
| <10 Times/Day                           | 40 (63.5%) | 46 (76.7%) | 86 (69.9%) |                     |
| >10 Times/Day                           | 23 (36.5%) | 14 (23.3%) | 37 (30.1%) |                     |
| Missing                                 | 4          | 0          | 4          |                     |
| <b><i>S. aureus</i> Genotype, n (%)</b> |            |            |            | 0.0001 <sup>1</sup> |
| USA300                                  | 39 (58.2%) | 12 (20.0%) | 51 (40.2%) |                     |

|                                                       |                     |            |            |
|-------------------------------------------------------|---------------------|------------|------------|
| Non-USA300                                            | 28 (41.8%)          | 48 (80.0%) | 76 (59.8%) |
| <b>mecA Gene from <i>S. aureus</i> Wound, n (%)</b>   | <.0001 <sup>1</sup> |            |            |
| Positive                                              | 60 (90.9%)          | 0 (0.0%)   | 60 (48.8%) |
| Negative                                              | 6 (9.1%)            | 53 (93.0%) | 59 (48.0%) |
| Not Determined                                        | 0 (0.0%)            | 4 (7.0%)   | 4 (3.3%)   |
| Missing                                               | 1                   | 3          | 4          |
| <b>ACME Gene from <i>S. aureus</i> Wound, n (%)</b>   | <.0001 <sup>1</sup> |            |            |
| Negative                                              | 27 (40.9%)          | 51 (89.5%) | 78 (63.4%) |
| Type I                                                | 38 (57.6%)          | 2 (3.5%)   | 40 (32.5%) |
| Type III                                              | 1 (1.5%)            | 0 (0.0%)   | 1 (0.8%)   |
| Not Determined                                        | 0 (0.0%)            | 4 (7.0%)   | 4 (3.3%)   |
| Missing                                               | 1                   | 3          | 4          |
| <b>SCCmec Gene from <i>S. aureus</i> Wound, n (%)</b> | <.0001 <sup>1</sup> |            |            |
| Negative                                              | 1 (1.5%)            | 1 (1.8%)   | 2 (1.6%)   |
| IVa                                                   | 52 (78.8%)          | 0 (0.0%)   | 52 (42.3%) |
| IVb                                                   | 1 (1.5%)            | 0 (0.0%)   | 1 (0.8%)   |
| IVc                                                   | 3 (4.5%)            | 0 (0.0%)   | 3 (2.4%)   |
| IVg                                                   | 1 (1.5%)            | 0 (0.0%)   | 1 (0.8%)   |
| IVh                                                   | 1 (1.5%)            | 0 (0.0%)   | 1 (0.8%)   |
| Not Determined                                        | 5 (7.6%)            | 56 (98.2%) | 61 (49.6%) |
| Novel Type                                            | 2 (3.0%)            | 0 (0.0%)   | 2 (1.6%)   |
| Missing                                               | 1                   | 3          | 4          |
| <b>PVL Gene from <i>S. aureus</i> Wound, n (%)</b>    | 0.0001 <sup>1</sup> |            |            |
| Positive                                              | 50 (75.8%)          | 20 (35.1%) | 70 (56.9%) |
| Negative                                              | 16 (24.2%)          | 33 (57.9%) | 49 (39.8%) |
| Not Determined                                        | 0 (0.0%)            | 4 (7.0%)   | 4 (3.3%)   |
| Missing                                               | 1                   | 3          | 4          |

<sup>1</sup>Chi-Square p-value;

**Table S3.** USA300 v non-USA300 in all study population.

|                                | <b>USA300<br/>(n=51)</b> | <b>Non-<br/>USA300<br/>(n=76)</b> | <b>Total<br/>(n=127)</b> | <b>P-value</b>    |
|--------------------------------|--------------------------|-----------------------------------|--------------------------|-------------------|
| <b>Gender, n (%)</b>           |                          |                                   |                          | 0.68 <sup>1</sup> |
| Female                         | 22 (43.1%)               | 30 (39.5%)                        | 52 (40.9%)               |                   |
| Male                           | 29 (56.9%)               | 46 (60.5%)                        | 75 (59.1%)               |                   |
| <b>Race, n (%)</b>             |                          |                                   |                          | 0.84 <sup>1</sup> |
| Black                          | 13 (40.6%)               | 17 (34.7%)                        | 30 (37.0%)               |                   |
| White                          | 9 (28.1%)                | 14 (28.6%)                        | 23 (28.4%)               |                   |
| Other Race                     | 10 (31.3%)               | 18 (36.7%)                        | 28 (34.6%)               |                   |
| Missing                        | 19                       | 27                                | 46                       |                   |
| <b>Ethnicity, n (%)</b>        |                          |                                   |                          | 0.88 <sup>1</sup> |
| Hispanic                       | 32 (65.3%)               | 44 (66.7%)                        | 76 (66.1%)               |                   |
| Non-Hispanic                   | 17 (34.7%)               | 22 (33.3%)                        | 39 (33.9%)               |                   |
| Missing                        | 2                        | 10                                | 12                       |                   |
| <b>Age (Years), n (%)</b>      |                          |                                   |                          | 0.91 <sup>1</sup> |
| < 19                           | 3 (5.9%)                 | 7 (9.2%)                          | 10 (7.9%)                |                   |
| 19-45                          | 31 (60.8%)               | 43 (56.6%)                        | 74 (58.3%)               |                   |
| 45-65                          | 15 (29.4%)               | 23 (30.3%)                        | 38 (29.9%)               |                   |
| > 65                           | 2 (3.9%)                 | 3 (3.9%)                          | 5 (3.9%)                 |                   |
| <b>Birthplace, n (%)</b>       |                          |                                   |                          | 0.04 <sup>1</sup> |
| US Born                        | 38 (74.5%)               | 43 (56.6%)                        | 46 (35.2%)               |                   |
| Non-US Born                    | 13 (25.5%)               | 33 (43.4%)                        | 81 (63.8%)               |                   |
| <b>Marital Status, n (%)</b>   |                          |                                   |                          | 0.54 <sup>1</sup> |
| Couple                         | 16 (32.0%)               | 28 (37.3%)                        | 44 (35.2%)               |                   |
| Single                         | 34 (68.0%)               | 47 (62.7%)                        | 81 (64.8%)               |                   |
| Missing                        | 1                        | 1                                 | 2                        |                   |
| <b>Education, n (%)</b>        |                          |                                   |                          | 0.40 <sup>1</sup> |
| High School or lower           | 33 (66.0%)               | 51 (68.0%)                        | 84 (67.2%)               |                   |
| College                        | 12 (24.0%)               | 12 (16.0%)                        | 24 (19.2%)               |                   |
| Bachelor or higher             | 5 (10.0%)                | 12 (16.0%)                        | 17 (13.6%)               |                   |
| Missing                        | 1                        | 1                                 | 2                        |                   |
| <b>Health Insurance, n (%)</b> |                          |                                   |                          | 0.52 <sup>1</sup> |
| Private or Other               | 12 (24.0%)               | 12 (16.0%)                        | 24 (19.2%)               |                   |
| Public (Medicare or Medicaid)  | 28 (56.0%)               | 45 (60.0%)                        | 73 (58.4%)               |                   |
| None                           | 10 (20.0%)               | 18 (24.0%)                        | 28 (22.4%)               |                   |
| Missing                        | 1                        | 1                                 | 2                        |                   |
| <b>Health Quality, n (%)</b>   |                          |                                   |                          | 0.58 <sup>1</sup> |
| Good                           | 31 (63.3%)               | 51 (69.9%)                        | 82 (67.2%)               |                   |
| Fair                           | 14 (28.6%)               | 19 (26.0%)                        | 33 (27.0%)               |                   |
| Poor                           | 4 (8.2%)                 | 3 (4.1%)                          | 7 (5.7%)                 |                   |

|                                                     |            |            |            |                      |
|-----------------------------------------------------|------------|------------|------------|----------------------|
| Missing                                             | 2          | 3          | 5          |                      |
| <b>Income, n (%)</b>                                |            |            |            | 0.66 <sup>1</sup>    |
| ≥\$40,000                                           | 4 (10.0%)  | 7 (13.0%)  | 11 (11.7%) |                      |
| < \$40,000                                          | 36 (90.0%) | 47 (87.0%) | 83 (88.3%) |                      |
| Missing                                             | 11         | 22         | 33         |                      |
| <b>First Time Infection, n (%)</b>                  |            |            |            | 0.66 <sup>1</sup>    |
| No                                                  | 14 (28.6%) | 18 (25.0%) | 32 (26.4%) |                      |
| Yes                                                 | 35 (71.4%) | 54 (75.0%) | 89 (73.6%) |                      |
| Missing                                             | 2          | 4          | 6          |                      |
| <b>Crowding Life Environment, n (%)</b>             |            |            |            | 0.10 <sup>1</sup>    |
| Yes                                                 | 35 (76.1%) | 45 (61.6%) | 80 (67.2%) |                      |
| No                                                  | 11 (23.9%) | 28 (38.4%) | 39 (32.8%) |                      |
| Missing                                             | 5          | 3          | 8          |                      |
| <b>Healthcare Exposure, n (%)</b>                   |            |            |            | 0.51 <sup>1</sup>    |
| Yes                                                 | 15 (31.9%) | 28 (37.8%) | 43 (35.5%) |                      |
| No                                                  | 32 (68.1%) | 46 (62.2%) | 78 (64.5%) |                      |
| Missing                                             | 4          | 2          | 6          |                      |
| <b>Animal Contact, n (%)</b>                        |            |            |            | 0.03 <sup>1</sup>    |
| Yes                                                 | 22 (45.8%) | 20 (27.0%) | 42 (34.4%) |                      |
| No                                                  | 26 (54.2%) | 54 (73.0%) | 80 (65.6%) |                      |
| Missing                                             | 3          | 2          | 5          |                      |
| <b>Had Wounds, n (%)</b>                            |            |            |            | 0.25 <sup>1</sup>    |
| Yes                                                 | 13 (26.5%) | 27 (36.5%) | 40 (32.5%) |                      |
| No                                                  | 36 (73.5%) | 47 (63.5%) | 83 (67.5%) |                      |
| Missing                                             | 2          | 2          | 4          |                      |
| <b>Social Network, n (%)</b>                        |            |            |            | 0.30 <sup>1</sup>    |
| Yes                                                 | 8 (16.7%)  | 18 (24.7%) | 26 (21.5%) |                      |
| No                                                  | 40 (83.3%) | 55 (75.3%) | 95 (78.5%) |                      |
| Missing                                             | 3          | 3          | 6          |                      |
| <b>Household Crowding, n (%)</b>                    |            |            |            | 0.18 <sup>1</sup>    |
| <2 People                                           | 10 (23.3%) | 23 (35.4%) | 33 (30.6%) |                      |
| >2 People                                           | 33 (76.7%) | 42 (64.6%) | 75 (69.4%) |                      |
| Missing                                             | 8          | 11         | 19         |                      |
| <b>Personal Hygiene, n (%)</b>                      |            |            |            | 0.10 <sup>1</sup>    |
| Not Sharing                                         | 23 (53.5%) | 24 (37.5%) | 47 (43.9%) |                      |
| Sharing                                             | 20 (46.5%) | 40 (62.5%) | 60 (56.1%) |                      |
| Missing                                             | 8          | 12         | 20         |                      |
| <b>Hand Washing, n (%)</b>                          |            |            |            | 0.92 <sup>1</sup>    |
| <10 Times/Day                                       | 34 (69.4%) | 52 (70.3%) | 86 (69.9%) |                      |
| >10 Times/Day                                       | 15 (30.6%) | 22 (29.7%) | 37 (30.1%) |                      |
| Missing                                             | 2          | 2          | 4          |                      |
| <b>mecA Gene from <i>S. aureus</i> Wound, n (%)</b> |            |            |            | <0.0001 <sup>1</sup> |

|                                                       |            |            |                      |
|-------------------------------------------------------|------------|------------|----------------------|
| Positive                                              | 39 (78.0%) | 21 (28.8%) | 60 (48.8%)           |
| Negative                                              | 11 (22.0%) | 48 (65.8%) | 59 (48.0%)           |
| Not Determined                                        | 0 (0.0%)   | 4 (5.5%)   | 4 (3.3%)             |
| Missing                                               | 1          | 3          | 4                    |
| <b>ACME Gene from <i>S. aureus</i> Wound, n (%)</b>   |            |            | <0.0001 <sup>1</sup> |
| Negative                                              | 14 (28.0%) | 64 (87.7%) | 78 (63.4%)           |
| Type I                                                | 35 (70.0%) | 5 (6.8%)   | 40 (32.5%)           |
| Type III                                              | 1 (2.0%)   | 0 (0.0%)   | 1 (0.8%)             |
| Not Determined                                        | 0 (0.0%)   | 4 (5.5%)   | 4 (3.3%)             |
| Missing                                               | 1          | 3          | 4                    |
| <b>SCCmec Gene from <i>S. aureus</i> Wound, n (%)</b> |            |            | <0.0001 <sup>1</sup> |
| Negative                                              | 1 (2.0%)   | 1 (1.4%)   | 2 (1.6%)             |
| IVa                                                   | 38 (76.0%) | 14 (19.2%) | 52 (42.3%)           |
| IVb                                                   | 0 (0.0%)   | 1 (1.4%)   | 1 (0.8%)             |
| IVc                                                   | 1 (2.0%)   | 2 (2.7%)   | 3 (2.4%)             |
| IVg                                                   | 0 (0.0%)   | 1 (1.4%)   | 1 (0.8%)             |
| IVh                                                   | 0 (0.0%)   | 1 (1.4%)   | 1 (0.8%)             |
| Not Determined                                        | 10 (20.0%) | 51 (69.9%) | 61 (49.6%)           |
| Novel Type                                            | 0 (0.0%)   | 2 (2.7%)   | 2 (1.6%)             |
| Missing                                               | 1          | 3          | 4                    |
| <b>PVL Gene from <i>S. aureus</i> Wound, n (%)</b>    |            |            | <0.0001 <sup>1</sup> |
| Positive                                              | 41 (82.0%) | 29 (39.7%) | 70 (56.9%)           |
| Negative                                              | 9 (18.0%)  | 40 (54.8%) | 49 (39.8%)           |
| Not Determined                                        | 0 (0.0%)   | 4 (5.5%)   | 4 (3.3%)             |
| Missing                                               | 1          | 3          | 4                    |

<sup>1</sup>Chi-Square p-value

**Table S4.** Population Characteristics of patients with *S. aureus* isolated from wound cultures.

|                              | MRSA                |                              |                 |             | MSSA                |                              |                 |             |
|------------------------------|---------------------|------------------------------|-----------------|-------------|---------------------|------------------------------|-----------------|-------------|
|                              | US Born<br>(N=47)   | Non-<br>US<br>Born<br>(N=20) | Total<br>(N=67) | P-<br>value | US Born<br>(N=34)   | Non-<br>US<br>Born<br>(N=26) | Total<br>(N=61) | P-<br>value |
| <b>Gender, n (%)</b>         | 0.77 <sup>1</sup>   |                              |                 |             | 0.85 <sup>1</sup>   |                              |                 |             |
| Female                       | 23<br>(48.9%)       | 9<br>(45.0%)                 | 32<br>(47.8%)   |             | 11<br>(32.4%)       | 9<br>(34.6%)                 | 20<br>(33.3%)   |             |
| Male                         | 24<br>(51.1%)       | 11<br>(55.0%)                | 35<br>(52.2%)   |             | 23<br>(67.6%)       | 17<br>(65.4%)                | 40<br>(66.7%)   |             |
| <b>Race, n (%)</b>           | 0.009 <sup>2</sup>  |                              |                 |             | 0.24 <sup>1</sup>   |                              |                 |             |
| Black                        | 15<br>(45.5%)       | 0 (0.0%)                     | 15<br>(36.6%)   |             | 12<br>(46.2%)       | 3<br>(21.4%)                 | 15<br>(37.5%)   |             |
| White                        | 10<br>(30.3%)       | 2<br>(25.0%)                 | 12<br>(29.3%)   |             | 7<br>(26.9%)        | 4<br>(28.6%)                 | 11<br>(27.5%)   |             |
| Other                        | 8<br>(24.2%)        | 6<br>(75.0%)                 | 14<br>(34.1%)   |             | 7<br>(26.9%)        | 7<br>(50.0%)                 | 14<br>(35.0%)   |             |
| Missing                      | 14                  | 12                           | 26              |             | 8                   | 12                           | 20              |             |
| <b>Ethnicity, n (%)</b>      | 0.06 <sup>1</sup>   |                              |                 |             | 0.04 <sup>1</sup>   |                              |                 |             |
| Hispanic                     | 27<br>(60.0%)       | 16<br>(84.2%)                | 43<br>(67.2%)   |             | 16<br>(53.3%)       | 17<br>(81.0%)                | 33<br>(64.7%)   |             |
| Non-Hispanic                 | 18<br>(40.0%)       | 3<br>(15.8%)                 | 21<br>(32.8%)   |             | 14<br>(46.7%)       | 4<br>(19.0%)                 | 18<br>(35.3%)   |             |
| Missing                      | 2                   | 1                            | 3               |             | 4                   | 5                            | 9               |             |
| <b>Age, n (%)</b>            | 0.35 <sup>2</sup>   |                              |                 |             | 0.11 <sup>2</sup>   |                              |                 |             |
| <19 Years                    | 6<br>(12.8%)        | 0 (0.0%)                     | 6 (9.0%)        |             | 4<br>(11.8%)        | 0<br>(0.0%)                  | 4 (6.7%)        |             |
| 19-45 Years                  | 28<br>(59.6%)       | 15<br>(75.0%)                | 43<br>(64.2%)   |             | 15<br>(44.1%)       | 16<br>(61.5%)                | 31<br>(51.7%)   |             |
| 45-65 Years                  | 11<br>(23.4%)       | 5<br>(25.0%)                 | 16<br>(23.9%)   |             | 12<br>(35.3%)       | 10<br>(38.5%)                | 22<br>(36.7%)   |             |
| > 65 Years                   | 2 (4.3%)            | 0 (0.0%)                     | 2 (3.0%)        |             | 3 (8.8%)            | 0<br>(0.0%)                  | 3 (5.0%)        |             |
| <b>Marital Status, n (%)</b> | 0.0006 <sup>1</sup> |                              |                 |             | 0.0003 <sup>1</sup> |                              |                 |             |
| Couple                       | 11<br>(23.4%)       | 13<br>(68.4%)                | 24<br>(36.4%)   |             | 5<br>(14.7%)        | 15<br>(60.0%)                | 20<br>(33.9%)   |             |
| Single                       | 36<br>(76.6%)       | 6<br>(31.6%)                 | 42<br>(63.6%)   |             | 29<br>(85.3%)       | 10<br>(40.0%)                | 39<br>(66.1%)   |             |
| Missing                      | 0                   | 1                            | 1               |             | 0                   | 1                            | 1               |             |
| <b>Education, n (%)</b>      | 0.003 <sup>2</sup>  |                              |                 |             | 0.14 <sup>2</sup>   |                              |                 |             |
| High School or Below         | 30<br>(63.8%)       | 11<br>(57.9%)                | 41<br>(62.1%)   |             | 24<br>(72.7%)       | 19<br>(73.1%)                | 43<br>(72.9%)   |             |
| College                      | 14<br>(29.8%)       | 1 (5.3%)                     | 15<br>(22.7%)   |             | 7<br>(21.2%)        | 2<br>(7.7%)                  | 9<br>(15.3%)    |             |



|                                         |                    |               |               |                    |               |               |
|-----------------------------------------|--------------------|---------------|---------------|--------------------|---------------|---------------|
| Bachelor or Above                       | 3 (6.4%)           | 7<br>(36.8%)  | 10<br>(15.2%) | 2 (6.1%)           | 5<br>(19.2%)  | 7<br>(11.9%)  |
| Missing                                 | 0                  | 1             | 1             | 1                  | 0             | 1             |
| <b>Health Insurance, n (%)</b>          | 0.001 <sup>1</sup> |               |               | 0.002 <sup>1</sup> |               |               |
| Private or Other                        | 10<br>(21.3%)      | 4<br>(21.1%)  | 14<br>(21.2%) | 4<br>(11.8%)       | 6<br>(24.0%)  | 10<br>(16.9%) |
| Public                                  | 33<br>(70.2%)      | 6<br>(31.6%)  | 39<br>(59.1%) | 26<br>(76.5%)      | 8<br>(32.0%)  | 34<br>(57.6%) |
| None                                    | 4 (8.5%)           | 9<br>(47.4%)  | 13<br>(19.7%) | 4<br>(11.8%)       | 11<br>(44.0%) | 15<br>(25.4%) |
| Missing                                 | 0                  | 1             | 1             | 0                  | 1             | 1             |
| <b>Health Quality, n (%)</b>            | 0.25 <sup>2</sup>  |               |               | 0.92 <sup>2</sup>  |               |               |
| Good                                    | 28<br>(63.6%)      | 16<br>(84.2%) | 44<br>(69.8%) | 22<br>(66.7%)      | 16<br>(61.5%) | 38<br>(64.4%) |
| Fair                                    | 13<br>(29.5%)      | 3<br>(15.8%)  | 16<br>(25.4%) | 9<br>(27.3%)       | 8<br>(30.8%)  | 17<br>(28.8%) |
| Poor                                    | 3 (6.8%)           | 0 (0.0%)      | 3 (4.8%)      | 2 (6.1%)           | 2<br>(7.7%)   | 4 (6.8%)      |
| Missing                                 | 3                  | 1             | 4             | 1                  | 0             | 1             |
| <b>Income, n (%)</b>                    | 0.38 <sup>1</sup>  |               |               | 0.81 <sup>1</sup>  |               |               |
| ≥\$40,000                               | 3 (7.9%)           | 2<br>(16.7%)  | 5<br>(10.0%)  | 3<br>(12.5%)       | 3<br>(15.0%)  | 6<br>(13.6%)  |
| < \$40,000                              | 35<br>(92.1%)      | 10<br>(83.3%) | 45<br>(90.0%) | 21<br>(87.5%)      | 17<br>(85.0%) | 38<br>(86.4%) |
| Missing                                 | 9                  | 8             | 17            | 10                 | 6             | 16            |
| <b>First Time Infection, n (%)</b>      | 0.79 <sup>1</sup>  |               |               | 0.16 <sup>1</sup>  |               |               |
| No                                      | 13<br>(29.5%)      | 5<br>(26.3%)  | 18<br>(28.6%) | 10<br>(31.3%)      | 4<br>(15.4%)  | 14<br>(24.1%) |
| Yes                                     | 31<br>(70.5%)      | 14<br>(73.7%) | 45<br>(71.4%) | 22<br>(68.8%)      | 22<br>(84.6%) | 44<br>(75.9%) |
| Missing                                 | 3                  | 1             | 4             | 2                  | 0             | 2             |
| <b>Crowding Life Environment, n (%)</b> | 0.78 <sup>1</sup>  |               |               | 0.11 <sup>1</sup>  |               |               |
| Yes                                     | 31<br>(75.6%)      | 15<br>(78.9%) | 46<br>(76.7%) | 16<br>(48.5%)      | 18<br>(69.2%) | 34<br>(57.6%) |
| no                                      | 10<br>(24.4%)      | 4<br>(21.1%)  | 14<br>(23.3%) | 17<br>(51.5%)      | 8<br>(30.8%)  | 25<br>(42.4%) |
| Missing                                 | 6                  | 1             | 7             | 1                  | 0             | 1             |
| <b>Healthcare Exposure, n (%)</b>       | 0.37 <sup>1</sup>  |               |               | 0.41 <sup>1</sup>  |               |               |
| No                                      | 26<br>(61.9%)      | 14<br>(73.7%) | 40<br>(65.6%) | 20<br>(58.8%)      | 18<br>(69.2%) | 38<br>(63.3%) |

|                                  |                   |               |               |                   |               |               |
|----------------------------------|-------------------|---------------|---------------|-------------------|---------------|---------------|
| Yes                              | 16<br>(38.1%)     | 5<br>(26.3%)  | 21<br>(34.4%) | 14<br>(41.2%)     | 8<br>(30.8%)  | 22<br>(36.7%) |
| Missing                          | 5                 | 1             | 6             | 0                 | 0             | 0             |
| <b>Contact Animal, n (%)</b>     | 0.27 <sup>1</sup> |               |               | 0.58 <sup>1</sup> |               |               |
| No                               | 23<br>(53.5%)     | 13<br>(68.4%) | 36<br>(58.1%) | 24<br>(70.6%)     | 20<br>(76.9%) | 44<br>(73.3%) |
| Yes                              | 20<br>(46.5%)     | 6<br>(31.6%)  | 26<br>(41.9%) | 10<br>(29.4%)     | 6<br>(23.1%)  | 16<br>(26.7%) |
| Missing                          | 4                 | 1             | 5             | 0                 | 0             | 0             |
| <b>Had Wounds, n (%)</b>         | 0.25 <sup>1</sup> |               |               | 0.20 <sup>1</sup> |               |               |
| No                               | 31<br>(70.5%)     | 16<br>(84.2%) | 47<br>(74.6%) | 18<br>(52.9%)     | 18<br>(69.2%) | 36<br>(60.0%) |
| Yes                              | 13<br>(29.5%)     | 3<br>(15.8%)  | 16<br>(25.4%) | 16<br>(47.1%)     | 8<br>(30.8%)  | 24<br>(40.0%) |
| Missing                          | 3                 | 1             | 4             |                   |               |               |
| <b>Social Network, n (%)</b>     | 0.28 <sup>1</sup> |               |               | 0.41 <sup>1</sup> |               |               |
| No                               | 30<br>(71.4%)     | 16<br>(84.2%) | 46<br>(75.4%) | 29<br>(85.3%)     | 20<br>(76.9%) | 49<br>(81.7%) |
| Yes                              | 12<br>(28.6%)     | 3<br>(15.8%)  | 15<br>(24.6%) | 5<br>(14.7%)      | 6<br>(23.1%)  | 11<br>(18.3%) |
| Missing                          | 5                 | 1             | 6             | 0                 | 0             | 0             |
| <b>Household Crowding, n (%)</b> | 0.08 <sup>1</sup> |               |               | 0.57 <sup>1</sup> |               |               |
| < 2 People                       | 15<br>(37.5%)     | 2<br>(13.3%)  | 17<br>(30.9%) | 10<br>(33.3%)     | 6<br>(26.1%)  | 16<br>(30.2%) |
| >2 People                        | 25<br>(62.5%)     | 13<br>(86.7%) | 38<br>(69.1%) | 20<br>(66.7%)     | 17<br>(73.9%) | 37<br>(69.8%) |
| Missing                          | 7                 | 5             | 12            | 4                 | 3             | 7             |
| <b>Personal Hygiene, n (%)</b>   | 0.06 <sup>1</sup> |               |               | 0.98 <sup>1</sup> |               |               |
| Not Sharing                      | 18<br>(45.0%)     | 11<br>(73.3%) | 29<br>(52.7%) | 10<br>(34.5%)     | 8<br>(34.8%)  | 18<br>(34.6%) |
| Sharing                          | 22<br>(55.0%)     | 4<br>(26.7%)  | 26<br>(47.3%) | 19<br>(65.5%)     | 15<br>(65.2%) | 34<br>(65.4%) |
| Missing                          | 7                 | 5             | 12            | 5                 | 3             | 8             |
| <b>Hand Washing, n (%)</b>       | 0.97 <sup>1</sup> |               |               | 0.51 <sup>1</sup> |               |               |
| <10 times/day                    | 28<br>(63.6%)     | 12<br>(63.2%) | 40<br>(63.5%) | 25<br>(73.5%)     | 21<br>(80.8%) | 46<br>(76.7%) |
| >10 times/day                    | 16<br>(36.4%)     | 7<br>(36.8%)  | 23<br>(36.5%) | 9<br>(26.5%)      | 5<br>(19.2%)  | 14<br>(23.3%) |
| Missing                          | 3                 | 1             | 4             | 0                 | 0             | 0             |

<sup>1</sup>Chi-Square p-value; <sup>2</sup>Fisher Exact p-value

**Table S5.** Population Characteristics based on birthplace and USA300 Genotype.

|                              | USA300            |                       |                 | P-value           | Non-USA300        |                       |                 | P-value             |
|------------------------------|-------------------|-----------------------|-----------------|-------------------|-------------------|-----------------------|-----------------|---------------------|
|                              | US Born<br>(N=38) | Non-US Born<br>(N=13) | Total<br>(N=51) |                   | US Born<br>(N=43) | Non-US Born<br>(N=33) | Total<br>(N=76) |                     |
| <b>Gender, n (%)</b>         |                   |                       |                 | 0.69 <sup>1</sup> |                   |                       |                 | 0.99 <sup>1</sup>   |
| Female                       | 17<br>(44.7%)     | 5<br>(38.5%)          | 22<br>(43.1%)   |                   | 17<br>(39.5%)     | 13<br>(39.4%)         | 30 (39.5%)      |                     |
| Male                         | 21<br>(55.3%)     | 8<br>(61.5%)          | 29<br>(56.9%)   |                   | 26<br>(60.5%)     | 20<br>(60.6%)         | 46 (60.5%)      |                     |
| <b>Race, n (%)</b>           |                   |                       |                 | 0.03 <sup>2</sup> |                   |                       |                 | 0.12 <sup>2</sup>   |
| Black                        | 13<br>(50.0%)     | 0 (0.0%)              | 13<br>(40.6%)   |                   | 14<br>(42.4%)     | 3<br>(18.8%)          | 17 (34.7%)      |                     |
| White                        | 7<br>(26.9%)      | 2<br>(33.3%)          | 9<br>(28.1%)    |                   | 10<br>(30.3%)     | 4<br>(25.0%)          | 14 (28.6%)      |                     |
| Other                        | 6<br>(23.1%)      | 4<br>(66.7%)          | 10<br>(31.3%)   |                   | 9<br>(27.3%)      | 9<br>(56.3%)          | 18 (36.7%)      |                     |
| Missing                      | 12                | 7                     | 19              |                   | 10                | 17                    | 27              |                     |
| <b>Ethnicity, n (%)</b>      |                   |                       |                 | 0.50 <sup>2</sup> |                   |                       |                 | 0.01 <sup>2</sup>   |
| Hispanic                     | 22<br>(61.1%)     | 10<br>(76.9%)         | 32<br>(65.3%)   |                   | 21<br>(53.8%)     | 23<br>(85.2%)         | 44 (66.7%)      |                     |
| Non-Hispanic                 | 14<br>(38.9%)     | 3<br>(23.1%)          | 17<br>(34.7%)   |                   | 18<br>(46.2%)     | 4<br>(14.8%)          | 22 (33.3%)      |                     |
| Missing                      | 2                 | 0                     | 2               |                   | 4                 | 6                     | 10              |                     |
| <b>Age, n (%)</b>            |                   |                       |                 | 0.93 <sup>2</sup> |                   |                       |                 | 0.02 <sup>2</sup>   |
| <19 Years                    | 3<br>(7.9%)       | 0 (0.0%)              | 3 (5.9%)        |                   | 7<br>(16.3%)      | 0 (0.0%)              | 7 (9.2%)        |                     |
| 19-45 Years                  | 22<br>(57.9%)     | 9<br>(69.2%)          | 31<br>(60.8%)   |                   | 21<br>(48.8%)     | 22<br>(66.7%)         | 43 (56.6%)      |                     |
| 45-65 Years                  | 11<br>(28.9%)     | 4<br>(30.8%)          | 15<br>(29.4%)   |                   | 12<br>(27.9%)     | 11<br>(33.3%)         | 23 (30.3%)      |                     |
| > 65 Years                   | 2<br>(5.3%)       | 0 (0.0%)              | 2 (3.9%)        |                   | 3 (7.0%)          | 0 (0.0%)              | 3 (3.9%)        |                     |
| <b>Marital Status, n (%)</b> |                   |                       |                 | 0.01 <sup>2</sup> |                   |                       |                 | 0.0001 <sup>1</sup> |

|                                    |                     |              |               |               |               |                    |
|------------------------------------|---------------------|--------------|---------------|---------------|---------------|--------------------|
| Couple                             | 8<br>(21.1%)<br>)   | 8<br>(66.7%) | 16<br>(32.0%) | 8<br>(18.6%)  | 20<br>(62.5%) | 28 (37.3%)         |
| Single                             | 30<br>(78.9%)<br>)  | 4<br>(33.3%) | 34<br>(68.0%) | 35<br>(81.4%) | 12<br>(37.5%) | 47 (62.7%)         |
| Missing                            | 0                   | 1            | 1             | 0             | 1             | 1                  |
| <b>Education, n (%)</b>            | 0.03 <sup>2</sup>   |              |               |               |               | 0.03 <sup>2</sup>  |
| High School or Below               | 24<br>(63.2%)<br>)  | 9<br>(75.0%) | 33<br>(66.0%) | 30<br>(71.4%) | 21<br>(63.6%) | 51 (68.0%)         |
| College                            | 12<br>(31.6%)<br>)  | 0 (0.0%)     | 12<br>(24.0%) | 9<br>(21.4%)  | 3 (9.1%)      | 12 (16.0%)         |
| Bachelor or Above                  | 2<br>(5.3%)         | 3<br>(25.0%) | 5<br>(10.0%)  | 3 (7.1%)      | 9<br>(27.3%)  | 12 (16.0%)         |
| Missing                            | 0                   | 1            | 1             | 1             | 0             | 1                  |
| <b>Healthcare Insurance, n (%)</b> | 0.0004 <sup>2</sup> |              |               |               |               | 0.002 <sup>1</sup> |
| Private or other                   | 9<br>(23.7%)<br>)   | 3<br>(25.0%) | 12<br>(24.0%) | 5<br>(11.6%)  | 7<br>(21.9%)  | 12 (16.0%)         |
| Public                             | 26<br>(68.4%)<br>)  | 2<br>(16.7%) | 28<br>(56.0%) | 33<br>(76.7%) | 12<br>(37.5%) | 45 (60.0%)         |
| none                               | 3<br>(7.9%)         | 7<br>(58.3%) | 10<br>(20.0%) | 5<br>(11.6%)  | 13<br>(40.6%) | 18 (24.0%)         |
| Missing                            | 0                   | 1            | 1             | 0             | 1             | 1                  |
| <b>Self-Rated Health, n (%)</b>    | 0.68 <sup>2</sup>   |              |               |               |               | 0.83 <sup>2</sup>  |
| Fair                               | 11<br>(29.7%)<br>)  | 3<br>(25.0%) | 14<br>(28.6%) | 11<br>(27.5%) | 8<br>(24.2%)  | 19 (26.0%)         |
| Good                               | 22<br>(59.5%)<br>)  | 9<br>(75.0%) | 31<br>(63.3%) | 28<br>(70.0%) | 23<br>(69.7%) | 51 (69.9%)         |
| Poor                               | 4<br>(10.8%)<br>)   | 0 (0.0%)     | 4 (8.2%)      | 1 (2.5%)      | 2 (6.1%)      | 3 (4.1%)           |
| Missing                            | 1                   | 1            | 2             | 3             | 0             | 3                  |
| <b>Income, n (%)</b>               | 0.21 <sup>2</sup>   |              |               |               |               | 1.00 <sup>2</sup>  |
| =>\$40,000                         | 2<br>(6.5%)         | 2<br>(22.2%) | 4<br>(10.0%)  | 4<br>(12.9%)  | 3<br>(13.0%)  | 7 (13.0%)          |
| < \$40,000                         | 29<br>(93.5%)<br>)  | 7<br>(77.8%) | 36<br>(90.0%) | 27<br>(87.1%) | 20<br>(87.0%) | 47 (87.0%)         |

|                                         |               |               |               |                   |               |            |                   |
|-----------------------------------------|---------------|---------------|---------------|-------------------|---------------|------------|-------------------|
| Missing                                 | 7             | 4             | 11            | 12                | 10            | 22         |                   |
| <b>First Time Infection, n (%)</b>      |               |               |               | 0.47 <sup>2</sup> |               |            | 0.49 <sup>1</sup> |
| No                                      | 12<br>(32.4%) | 2<br>(16.7%)  | 14<br>(28.6%) | 11<br>(28.2%)     | 7<br>(21.2%)  | 18 (25.0%) |                   |
| Yes                                     | 25<br>(67.6%) | 10<br>(83.3%) | 35<br>(71.4%) | 28<br>(71.8%)     | 26<br>(78.8%) | 54 (75.0%) |                   |
| Missing                                 | 1             | 1             | 2             | 4                 | 0             | 4          |                   |
| <b>Crowding Life Environment, n (%)</b> |               |               |               | 0.70 <sup>2</sup> |               |            | 0.20 <sup>1</sup> |
| Yes                                     | 25<br>(73.5%) | 10<br>(83.3%) | 35<br>(76.1%) | 22<br>(55.0%)     | 23<br>(69.7%) | 45 (61.6%) |                   |
| No                                      | 9<br>(26.5%)  | 2<br>(16.7%)  | 11<br>(23.9%) | 18<br>(45.0%)     | 10<br>(30.3%) | 28 (38.4%) |                   |
| Missing                                 | 4             | 1             | 5             | 3                 | 0             | 3          |                   |
| <b>Healthcare Exposure, N (%)</b>       |               |               |               | 0.73 <sup>2</sup> |               |            | 0.23 <sup>1</sup> |
| Yes                                     | 12<br>(34.3%) | 3<br>(25.0%)  | 15<br>(31.9%) | 18<br>(43.9%)     | 10<br>(30.3%) | 28 (37.8%) |                   |
| No                                      | 23<br>(65.7%) | 9<br>(75.0%)  | 32<br>(68.1%) | 23<br>(56.1%)     | 23<br>(69.7%) | 46 (62.2%) |                   |
| Missing                                 | 3             | 1             | 4             | 2                 | 0             | 2          |                   |
| <b>Contact Animal, n (%)</b>            |               |               |               | 0.74 <sup>1</sup> |               |            | 0.12 <sup>1</sup> |
| Yes                                     | 16<br>(44.4%) | 6<br>(50.0%)  | 22<br>(45.8%) | 14<br>(34.1%)     | 6<br>(18.2%)  | 20 (27.0%) |                   |
| No                                      | 20<br>(55.6%) | 6<br>(50.0%)  | 26<br>(54.2%) | 27<br>(65.9%)     | 27<br>(81.8%) | 54 (73.0%) |                   |
| Missing                                 | 2             | 1             | 3             | 2                 | 0             | 2          |                   |
| <b>Had Wounds, n (%)</b>                |               |               |               | 0.47 <sup>2</sup> |               |            | 0.14 <sup>1</sup> |
| Yes                                     | 11<br>(29.7%) | 2<br>(16.7%)  | 13<br>(26.5%) | 18<br>(43.9%)     | 9<br>(27.3%)  | 27 (36.5%) |                   |
| No                                      | 26<br>(70.3%) | 10<br>(83.3%) | 36<br>(73.5%) | 23<br>(56.1%)     | 24<br>(72.7%) | 47 (63.5%) |                   |

|                                      |               |               |               |                   |               |            |                   |
|--------------------------------------|---------------|---------------|---------------|-------------------|---------------|------------|-------------------|
| Missing                              | 1             | 1             | 2             | 2                 | 0             | 2          |                   |
| <b>Social Network,<br/>n (%)</b>     |               |               |               | 1.00 <sup>2</sup> |               |            | 0.54 <sup>1</sup> |
| Yes                                  | 6<br>(16.7%)  | 2<br>(16.7%)  | 8<br>(16.7%)  | 11<br>(27.5%)     | 7<br>(21.2%)  | 18 (24.7%) |                   |
| No                                   | 30<br>(83.3%) | 10<br>(83.3%) | 40<br>(83.3%) | 29<br>(72.5%)     | 26<br>(78.8%) | 55 (75.3%) |                   |
| Missing                              | 2             | 1             | 3             | 3                 | 0             | 3          |                   |
| <b>Household<br/>Crowding, n (%)</b> |               |               |               | 0.41 <sup>2</sup> |               |            | 0.13 <sup>1</sup> |
| <2 People                            | 9<br>(27.3%)  | 1<br>(10.0%)  | 10<br>(23.3%) | 16<br>(43.2%)     | 7<br>(25.0%)  | 23 (35.4%) |                   |
| >2 People                            | 24<br>(72.7%) | 9<br>(90.0%)  | 33<br>(76.7%) | 21<br>(56.8%)     | 21<br>(75.0%) | 42 (64.6%) |                   |
| Missing                              | 5             | 3             | 8             | 6                 | 5             | 11         |                   |
| <b>Personal<br/>Hygiene, n (%)</b>   |               |               |               | 0.29 <sup>2</sup> |               |            | 0.44 <sup>1</sup> |
| Not Sharing                          | 16<br>(48.5%) | 7<br>(70.0%)  | 23<br>(53.5%) | 12<br>(33.3%)     | 12<br>(42.9%) | 24 (37.5%) |                   |
| Sharing                              | 17<br>(51.5%) | 3<br>(30.0%)  | 20<br>(46.5%) | 24<br>(66.7%)     | 16<br>(57.1%) | 40 (62.5%) |                   |
| Missing                              | 5             | 3             | 8             | 7                 | 5             | 12         |                   |
| <b>Washing Hands,<br/>n (%)</b>      |               |               |               | 0.30 <sup>2</sup> |               |            | 0.92 <sup>1</sup> |
| <10 times/day                        | 24<br>(64.9%) | 10<br>(83.3%) | 34<br>(69.4%) | 29<br>(70.7%)     | 23<br>(69.7%) | 52 (70.3%) |                   |
| >10 times/day                        | 13<br>(35.1%) | 2<br>(16.7%)  | 15<br>(30.6%) | 12<br>(29.3%)     | 10<br>(30.3%) | 22 (29.7%) |                   |
| Missing                              | 1             | 1             | 2             | 2                 | 0             | 2          |                   |

<sup>1</sup>Chi-Square p-value; <sup>2</sup>Fisher Exact p-value

**Table S6.** Molecular characteristics of wound identified as *Staphylococcus aureus* by birthplace and type.

|                                                               | MRSA              |                          |                 |                      | MSSA              |                          |                 |                      |
|---------------------------------------------------------------|-------------------|--------------------------|-----------------|----------------------|-------------------|--------------------------|-----------------|----------------------|
|                                                               | US born<br>(N=47) | Non-US<br>born<br>(N=20) | Total<br>(N=67) | P-value <sup>1</sup> | US born<br>(N=34) | Non-US<br>born<br>(N=26) | Total<br>(N=60) | P-value <sup>1</sup> |
| <b>mecA Gene from<br/><i>S. aureus</i> Wound,<br/>n (%)</b>   | 1.00              |                          |                 |                      | 0.62              |                          |                 |                      |
| Positive                                                      | 42 (91.3%)        | 18 (90.0%)               | 60 (90.9%)      |                      | 0 (0.0%)          | 0 (0.0%)                 | 0 (0.0%)        |                      |
| Negative                                                      | 4 (8.7%)          | 2 (10.0%)                | 6 (9.1%)        |                      | 27 (87.1%)        | 25 (92.6%)               | 52 (89.7%)      |                      |
| Not Determined                                                | 0 (0.0%)          | 0 (0.0%)                 | 0 (0.0%)        |                      | 3 (9.7%)          | 1 (3.8%)                 | 4 (7.0%)        |                      |
| Missing                                                       | 1                 | 0                        | 1               |                      | 3                 | 0                        | 3               |                      |
| <b>ACME Gene<br/>from <i>S. aureus</i><br/>Wound, n (%)</b>   | 0.25              |                          |                 |                      | 0.44              |                          |                 |                      |
| Negative                                                      | 16 (34.8%)        | 11 (55.0%)               | 27 (40.9%)      |                      | 26 (83.9%)        | 25 (96.2%)               | 51 (89.5%)      |                      |
| Type I                                                        | 29 (63.0%)        | 9 (45.0%)                | 38 (57.6%)      |                      | 2 (6.5%)          | 0 (0.0%)                 | 2 (3.5%)        |                      |
| Type III                                                      | 1 (2.2%)          | 0 (0.0%)                 | 1 (1.5%)        |                      | 0 (0.0%)          | 0 (0.0%)                 | 0 (0.0%)        |                      |
| Not Determined                                                |                   |                          |                 |                      | 3 (9.7%)          | 1 (3.8%)                 | 4 (7.0%)        |                      |
| Missing                                                       | 1                 | 0                        | 1               |                      | 3                 | 0                        | 3               |                      |
| <b>SCCmec Gene<br/>from <i>S. aureus</i><br/>Wound, n (%)</b> | 0.90              |                          |                 |                      | 1.00              |                          |                 |                      |
| Negative                                                      | 0 (0.0%)          | 1 (5.0%)                 | 1 (1.5%)        |                      | 1 (3.2%)          | 0 (0.0%)                 | 1 (1.8%)        |                      |
| Iva                                                           | 35 (76.1%)        | 17 (85.0%)               | 52 (78.8%)      |                      | 0 (0.0%)          | 0 (0.0%)                 | 0 (0.0%)        |                      |
| IVb                                                           | 1 (2.2%)          | 0 (0.0%)                 | 1 (1.5%)        |                      | 0 (0.0%)          | 0 (0.0%)                 | 0 (0.0%)        |                      |
| IVc                                                           | 2 (4.3%)          | 1 (5.0%)                 | 3 (4.5%)        |                      | 0 (0.0%)          | 0 (0.0%)                 | 0 (0.0%)        |                      |
| IVg                                                           | 1 (2.2%)          | 0 (0.0%)                 | 1 (1.5%)        |                      | 0 (0.0%)          | 0 (0.0%)                 | 0 (0.0%)        |                      |
| IVh                                                           | 1 (2.2%)          | 0 (0.0%)                 | 1 (1.5%)        |                      | 0 (0.0%)          | 0 (0.0%)                 | 0 (0.0%)        |                      |
| Not Determined                                                | 4 (8.7%)          | 1 (5.0%)                 | 5 (7.6%)        |                      | 30 (96.8%)        | 26 (100.0%)              | 56 (98.2%)      |                      |
| Novel Type                                                    | 2 (4.3%)          | 0 (0.0%)                 | 2 (3.0%)        |                      | 0 (0.0%)          | 0 (0.0%)                 | 0 (0.0%)        |                      |
| Missing                                                       | 1                 | 0                        | 1               |                      | 3                 | 0                        | 3               |                      |
| <b>PVL Gene from <i>S.<br/>aureus</i> Wound, n<br/>(%)</b>    | 0.54              |                          |                 |                      | 0.77              |                          |                 |                      |
| Positive                                                      | 36 (78.3%)        | 14 (70.0%)               | 50 (75.8%)      |                      | 11 (35.5%)        | 9 (34.6%)                | 20 (35.1%)      |                      |
| Negative                                                      | 10 (21.7%)        | 6 (30.0%)                | 16 (24.2%)      |                      | 17 (54.8%)        | 16 (61.5%)               | 33 (57.9%)      |                      |
| Not Determined                                                | 0 (0.0%)          | 0 (0.0%)                 | 0 (0.0%)        |                      | 3 (9.7%)          | 1 (3.8%)                 | 4 (7.0%)        |                      |
| Missing                                                       | 1                 | 0                        | 1               |                      | 3                 | 0                        | 3               |                      |

<sup>1</sup>Fisher Exact p-value

**Table S7.** Molecular characteristics for genotype by birthplace and *Staphylococcus aureus*.

|                                                       | USA300            |                       |                 | P-value           | Non-USA300        |                       |                 | P-value           |
|-------------------------------------------------------|-------------------|-----------------------|-----------------|-------------------|-------------------|-----------------------|-----------------|-------------------|
|                                                       | US Born<br>(N=38) | Non-US Born<br>(N=13) | Total<br>(N=51) |                   | US Born<br>(N=43) | Non-US Born<br>(N=33) | Total<br>(N=76) |                   |
| <b>mecA Gene from <i>S. aureus</i> Wound, n (%)</b>   |                   |                       |                 | 0.44 <sup>2</sup> |                   |                       |                 | 0.73 <sup>2</sup> |
| Positive                                              | 30<br>(81.1%)     | 9<br>(69.2%)          | 39<br>(78.0%)   |                   | 12<br>(30.0%)     | 9<br>(27.3%)          | 21<br>(28.8%)   |                   |
| Negative                                              | 7<br>(18.9%)      | 4<br>(30.8%)          | 11<br>(22.0%)   |                   | 25<br>(62.5%)     | 23<br>(69.7%)         | 48<br>(65.8%)   |                   |
| Not Determined                                        | 0 (0.0%)          | 0 (0.0%)              | 0 (0.0%)        |                   | 3 (7.5%)          | 1 (3.0%)              | 4 (5.5%)        |                   |
| Missing                                               | 1                 | 0                     | 1               |                   | 3                 | 0                     | 3               |                   |
| <b>ACME Gene from <i>S. aureus</i> Wound, n (%)</b>   |                   |                       |                 | 0.23 <sup>2</sup> |                   |                       |                 | 0.76 <sup>2</sup> |
| Negative                                              | 8<br>(21.6%)      | 6<br>(46.2%)          | 14<br>(28.0%)   |                   | 34<br>(85.0%)     | 30<br>(90.9%)         | 64<br>(87.7%)   |                   |
| Not Determined                                        | 0 (0.0%)          | 0 (0.0%)              | 0 (0.0%)        |                   | 3 (7.5%)          | 1 (3.0%)              | 4 (5.5%)        |                   |
| Type I                                                | 28<br>(75.7%)     | 7<br>(53.8%)          | 35<br>(70.0%)   |                   | 3 (7.5%)          | 2 (6.1%)              | 5 (6.8%)        |                   |
| Type III                                              | 1 (2.7%)          | 0 (0.0%)              | 1 (2.0%)        |                   | 0 (0.0%)          | 0 (0.0%)              | 0 (0.0%)        |                   |
| Missing                                               | 1                 | 0                     | 1               |                   | 3                 | 0                     | 3               |                   |
| <b>SCCmec Gene from <i>S. aureus</i> Wound, n (%)</b> |                   |                       |                 | 0.69 <sup>2</sup> |                   |                       |                 | 0.70 <sup>2</sup> |
| Negative                                              | 1 (2.7%)          | 0 (0.0%)              | 1 (2.0%)        |                   | 0 (0.0%)          | 1 (3.0%)              | 1 (1.4%)        |                   |
| Iva                                                   | 29<br>(78.4%)     | 9<br>(69.2%)          | 38<br>(76.0%)   |                   | 6<br>(15.0%)      | 8<br>(24.2%)          | 14<br>(19.2%)   |                   |
| IVb                                                   | 0 (0.0%)          | 0 (0.0%)              | 0 (0.0%)        |                   | 1 (2.5%)          | 0 (0.0%)              | 1 (1.4%)        |                   |
| IVc                                                   | 1 (2.7%)          | 0 (0.0%)              | 1 (2.0%)        |                   | 1 (2.5%)          | 1 (3.0%)              | 2 (2.7%)        |                   |
| IVg                                                   | 0 (0.0%)          | 0 (0.0%)              | 0 (0.0%)        |                   | 1 (2.5%)          | 0 (0.0%)              | 1 (1.4%)        |                   |
| IVh                                                   | 0 (0.0%)          | 0 (0.0%)              | 0 (0.0%)        |                   | 1 (2.5%)          | 0 (0.0%)              | 1 (1.4%)        |                   |
| Not Determined                                        | 6<br>(16.2%)      | 4<br>(30.8%)          | 10<br>(20.0%)   |                   | 28<br>(70.0%)     | 23<br>(69.7%)         | 51<br>(69.9%)   |                   |
| Novel Type                                            | 0 (0.0%)          | 0 (0.0%)              | 0 (0.0%)        |                   | 2 (5.0%)          | 0 (0.0%)              | 2 (2.7%)        |                   |
| Missing                                               | 1                 | 0                     | 1               |                   | 3                 | 0                     | 3               |                   |
| <b>PVL Gene from <i>S. aureus</i> Wound, n (%)</b>    |                   |                       |                 | 0.21 <sup>2</sup> |                   |                       |                 | 0.74 <sup>2</sup> |
| Positive                                              | 32<br>(86.5%)     | 9<br>(69.2%)          | 41<br>(82.0%)   |                   | 15<br>(37.5%)     | 14<br>(42.4%)         | 29<br>(39.7%)   |                   |



|                |              |              |              |               |               |               |
|----------------|--------------|--------------|--------------|---------------|---------------|---------------|
| Negative       | 5<br>(13.5%) | 4<br>(30.8%) | 9<br>(18.0%) | 22<br>(55.0%) | 18<br>(54.5%) | 40<br>(54.8%) |
| Not Determined | 0 (0.0%)     | 0 (0.0%)     | 0 (0.0%)     | 3 (7.5%)      | 1 (3.0%)      | 4 (5.5%)      |
| Missing        | 1            | 0            | 1            | 3             | 0             | 3             |

---

<sup>1</sup>Chi-Square p-value; <sup>2</sup>Fisher Exact p-value

**Table S8.** Ethnic community neighborhoods by race and ethnicity stratified by US-born and non-US born

| Community<br>Neighborhood | US Born                    |                 |                 |                                 |                   | Non-US Born                |                |                 |                                 |                   |
|---------------------------|----------------------------|-----------------|-----------------|---------------------------------|-------------------|----------------------------|----------------|-----------------|---------------------------------|-------------------|
|                           | Patient Race and Ethnicity |                 |                 |                                 |                   | Patient Race and Ethnicity |                |                 |                                 |                   |
|                           | Black<br>(N=27)            | White<br>(N=17) | Other<br>(N=15) | Hispanic <sup>1</sup><br>(N=43) | Missing<br>(N=22) | Black<br>(N=3)             | White<br>(N=6) | Other<br>(N=13) | Hispanic <sup>1</sup><br>(N=33) | Missing<br>(N=24) |
| Americas                  | 0 (0.0%)                   | 0 (0.0%)        | 2<br>(15.4%)    | 2 (4.9%)                        | 0                 | 0 (0.0%)                   | 0 (0.0%)       | 1 (8.3%)        | 3 (9.4%)                        | 2                 |
| Asia                      | 0 (0.0%)                   | 1 (5.9%)        | 0 (0.0%)        | 0 (0.0%)                        | 0                 | 0 (0.0%)                   | 1<br>(16.7%)   | 0 (0.0%)        | 2 (6.3%)                        | 2                 |
| Black                     | 15<br>(55.6%)              | 5<br>(29.4%)    | 5<br>(38.5%)    | 9 (22.0%)                       | 4                 | 2<br>(100.0%)              | 1<br>(16.7%)   | 1 (8.3%)        | 3 (9.4%)                        | 3                 |
| Europe                    | 0 (0.0%)                   | 0 (0.0%)        | 0 (0.0%)        | 0 (0.0%)                        | 1                 | 0 (0.0%)                   | 1<br>(16.7%)   | 0 (0.0%)        | 0 (0.0%)                        | 0                 |
| Hispanic                  | 9<br>(33.3%)               | 4<br>(23.5%)    | 6<br>(46.2%)    | 26<br>(63.4%)                   | 15                | 0 (0.0%)                   | 3<br>(50.0%)   | 8<br>(66.7%)    | 19<br>(59.4%)                   | 12                |
| White                     | 3<br>(11.1%)               | 7<br>(41.2%)    | 0 (0.0%)        | 4 (9.8%)                        | 2                 | 0 (0.0%)                   | 0 (0.0%)       | 2<br>(16.7%)    | 5 (15.6%)                       | 5                 |
| Missing                   | 0                          | 0               | 2               | 2                               | 0                 | 1                          | 0              | 1               | 1                               | 0                 |

<sup>1</sup>Patients who reported Hispanic ethnicity are not excluded in race counts

**Table S9.** Distribution of ESRI tapestry segment name by methicillin susceptibility stratified by US-born and non-US born.

| Life Mode Group    | Neighborhood Segment Name  | Description                                    | US Born    |            |         | Non-US Born |            |         |
|--------------------|----------------------------|------------------------------------------------|------------|------------|---------|-------------|------------|---------|
|                    |                            |                                                | MRSA N (%) | MSSA N (%) | p-value | MRSA N (%)  | MSSA N (%) | p-value |
| Upscale Avenues    | Enterprising Professionals | White, College Degree                          | 1 (2.2%)   | 0 (0%)     | 0.32    | 0 (0%)      | 0 (0.0%)   | 0.29    |
|                    | Pacific Heights            | Asian/Pacific Islander, College Degree         | 0 (0%)     | 0 (0%)     |         | 1 (5.3%)    | 0 (0.0%)   |         |
| Uptown Individuals | Laptops and Lattes         | White, College Degree                          | 0 (0%)     | 0 (0%)     |         | 0 (0%)      | 1 (4.0%)   |         |
|                    | Trendsetters               | White, College Degree                          | 0 (0%)     | 0 (0%)     |         | 0 (0%)      | 1 (4.0%)   |         |
| Middle Ground      | City Lights                | White, College Degree                          | 2 (4.4%)   | 0 (0%)     |         | 0 (0%)      | 0 (0.0%)   |         |
|                    | Downtown Melting Pot       | White/Asian / Pacific Islander, College Degree | 5 (10.9%)  | 5 (15.2%)  |         | 2 (10.5%)   | 7 (28.0%)  |         |
| Senior Styles      | Golden Years               | White, College Degree                          | 0 (0%)     | 0 (0%)     |         | 1 (5.3%)    | 0 (0.0%)   |         |
|                    | Social Security Set        | White/Black, HS Diploma Only                   | 0 (0%)     | 1 (3.0%)   |         | 0 (0%)      | 0 (0.0%)   |         |
| Midtown Singles    | City Strivers              | Black, HS Diploma Only                         | 4 (8.7%)   | 6 (18.2%)  |         | 2 (10.5%)   | 3 (12.0%)  |         |
| Hometown           | Family Foundations         | Black, HS Diploma Only                         | 0 (0%)     | 0 (0%)     |         | 1 (5.3%)    | 0 (0.0%)   |         |
| Next Wave          | High Rise Renters          | Hispanic, No HS Diploma                        | 31 (67.4%) | 21 (63.6%) |         | 9 (47.4%)   | 8 (32.0%)  |         |
|                    | International Marketplace  | Hispanic, No HS Diploma                        | 3 (6.5%)   | 0 (0%)     |         | 1 (5.3%)    | 5 (20.0%)  |         |

|  |                  |                               |                                            |        |             |          |
|--|------------------|-------------------------------|--------------------------------------------|--------|-------------|----------|
|  | Las Casas        | Hispanic,<br>No HS<br>Diploma | 0 (0%)                                     | 0 (0%) | 1<br>(5.3%) | 0 (0.0%) |
|  | NeWest Residents | Hispanic,<br>No HS<br>Diploma | 0 (0%)                                     | 0 (0%) | 1<br>(5.3%) | 0 (0.0%) |
|  | Missing          | Unclassified                  | Insufficient<br>data for<br>classification | 0      | 0           | 1        |
